# Supplementary material
Source: PubMed Central journal article supplement (PMC11633843)
Supplement: NIHMS2033725-supplement-Padmanaban_Nature_2024_SuppFiles.pdf [file NIHMS2033725-supplement-Padmanaban_Nature_2024_SuppFiles.pdf]

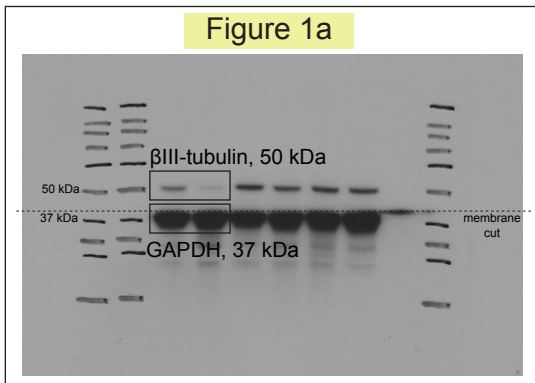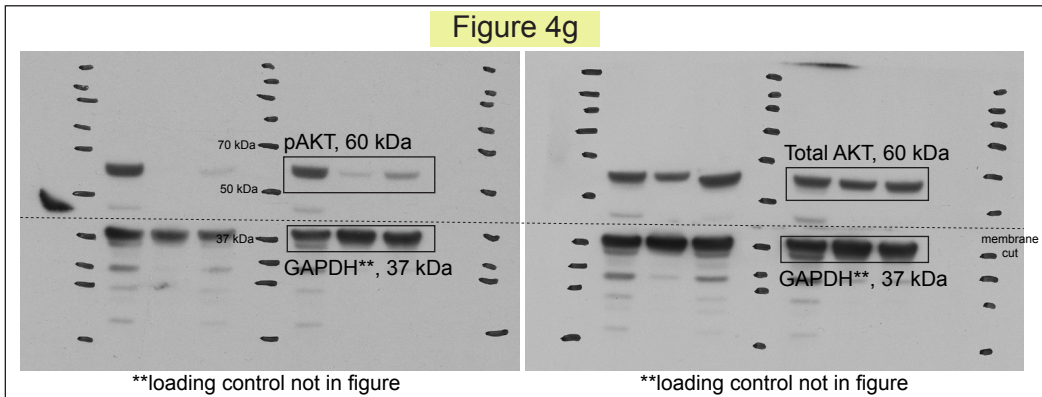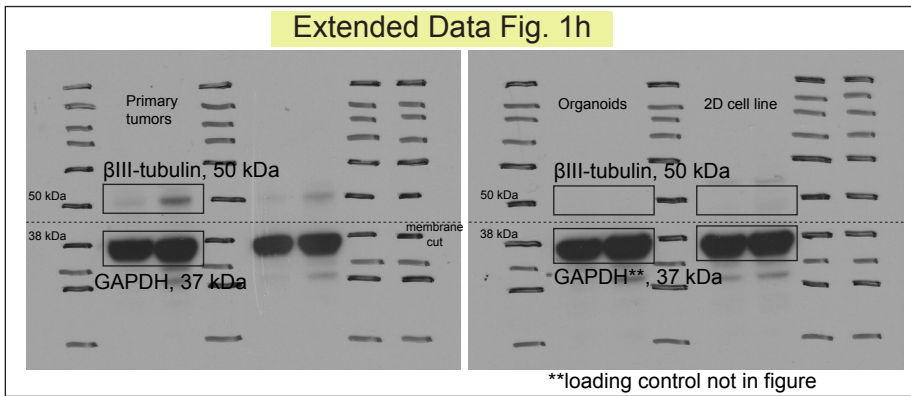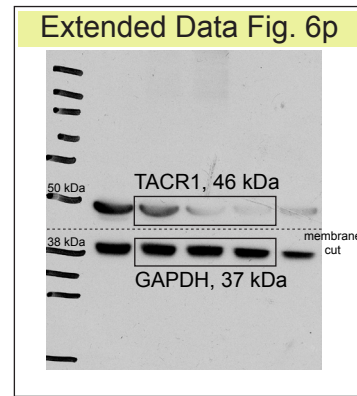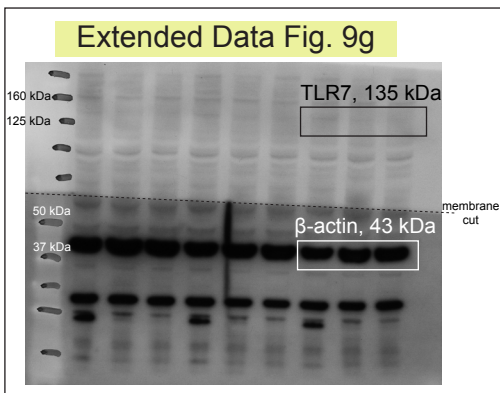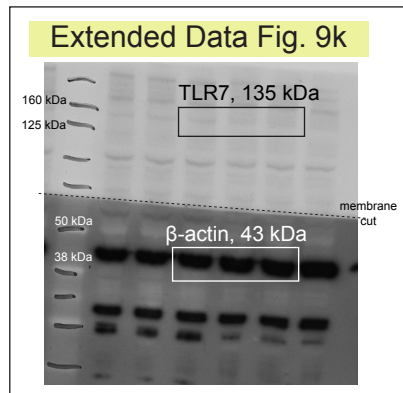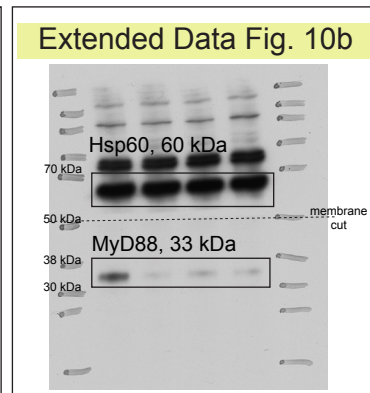

Supplementary Figure 1. Uncropped Western blot scans.

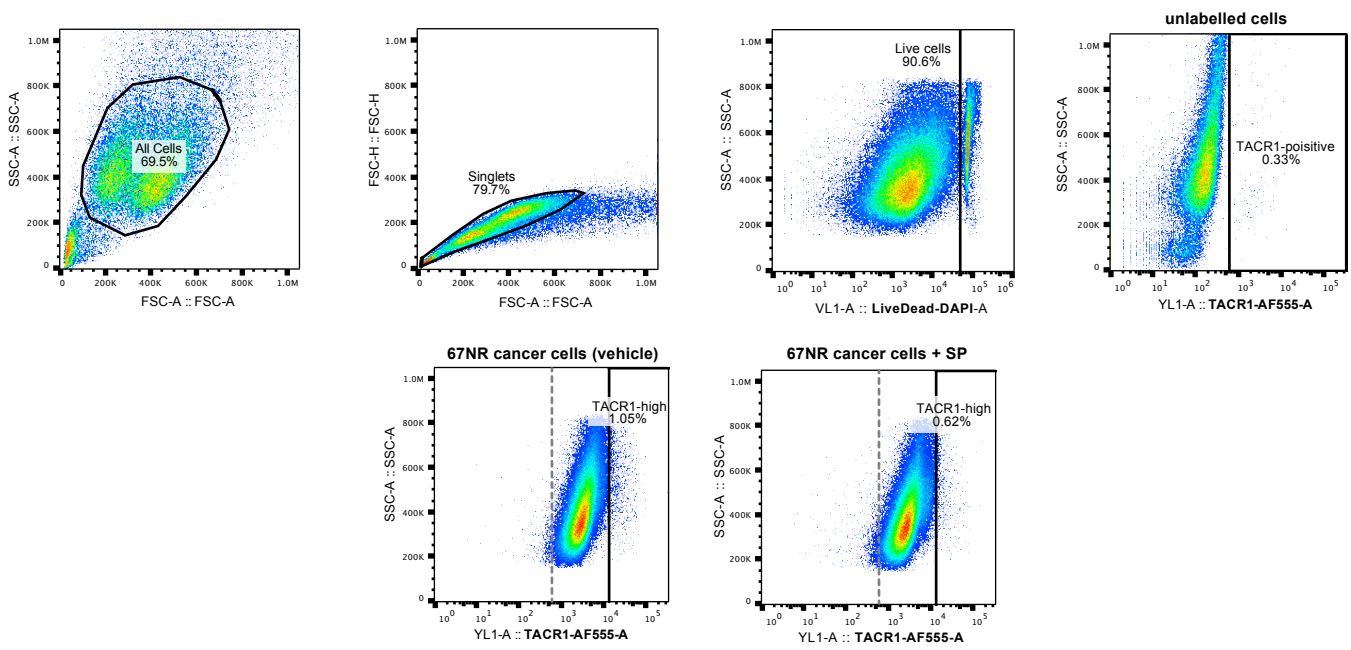

**Supplementary Figure 2.** Gating strategy. Top row (left-right): All cells, singlets, live cells, TACR1-high cells. Bottom row (left to right): TACR1-high events in 67NR cells cultured alone or with SP. Plots also in Extended Data Fig. 9c.
